# Supplementary material
Source: Springer Nature journal article supplement (https://www.springermedizin.de/resource/supplementary/13256_2010_1398_MOESM1_ESM.pdf/9648112)
Supplement: MOESM1 [file 9648112]

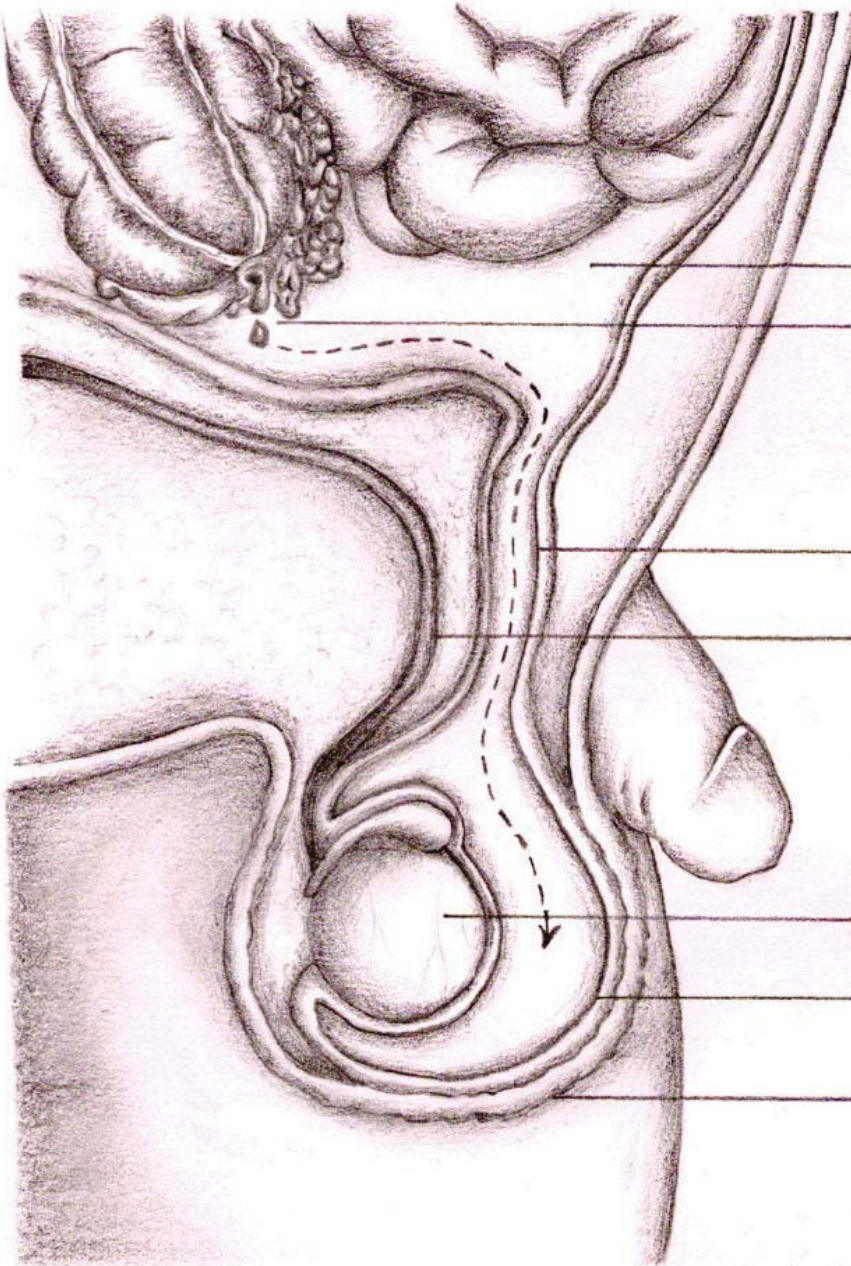

PERITONEAL CAVITY

INFLAMED AND PERFORATED APPENDIX

PATENT PROCESSUS VAGINALIS

VAS DEFERENS

TESTIS

TUNICA VAGINALIS

SCROTUM
